# Supplementary material for: Prevention and Treatment of Fungal Skin Infections Using Cationic Polymeric Films
Source: MDPI journal article supplement (doi:10.3390/pharmaceutics13081161), 2021-07-28
Supplement: s1 [file s1]

# Supplementary Materials: Prevention and Treatment of Fungal Skin Infections Using Cationic Polymeric Films

Fritz Ka-Ho Ho, Albert Bolhuis and M. Begoña Delgado-Charro

**Table S1.** Analytical and calibration parameters for the detection of iron using ICP-OES.

| Parameter                   | Fe         |
|-----------------------------|------------|
| Calibration range           | 0.1–50 ppm |
| Limit of Detection (LoD)    | 3.57 ppm   |
| Limit of Quantitation (LoQ) | 11.92 ppm  |
| $R^2$                       | 0.99       |

**Table S2.** Analytical and calibration parameters for the detection of glucose and mannose using LCMS.

| Parameter                   | Glucose                      | Mannose                      |
|-----------------------------|------------------------------|------------------------------|
| Calibration range           | 10–200 $\mu\text{g mL}^{-1}$ | 10–200 $\mu\text{g mL}^{-1}$ |
| Limit of Detection (LoD)    | 46.24 $\mu\text{g mL}^{-1}$  | 44.29 $\mu\text{g mL}^{-1}$  |
| Limit of Quantitation (LoQ) | 154.12 $\mu\text{g mL}^{-1}$ | 147.63 $\mu\text{g mL}^{-1}$ |
| $R^2$                       | 0.98                         | 0.98                         |
